# Supplementary material for: Detention in Juvenile Correctional Facilities Is Associated with Higher Platelet Monoamine Oxidase B Activity in Males
Source: MDPI journal article supplement (doi:10.3390/biom10111555), 2020-11-15
Supplement: s1 [file s1]

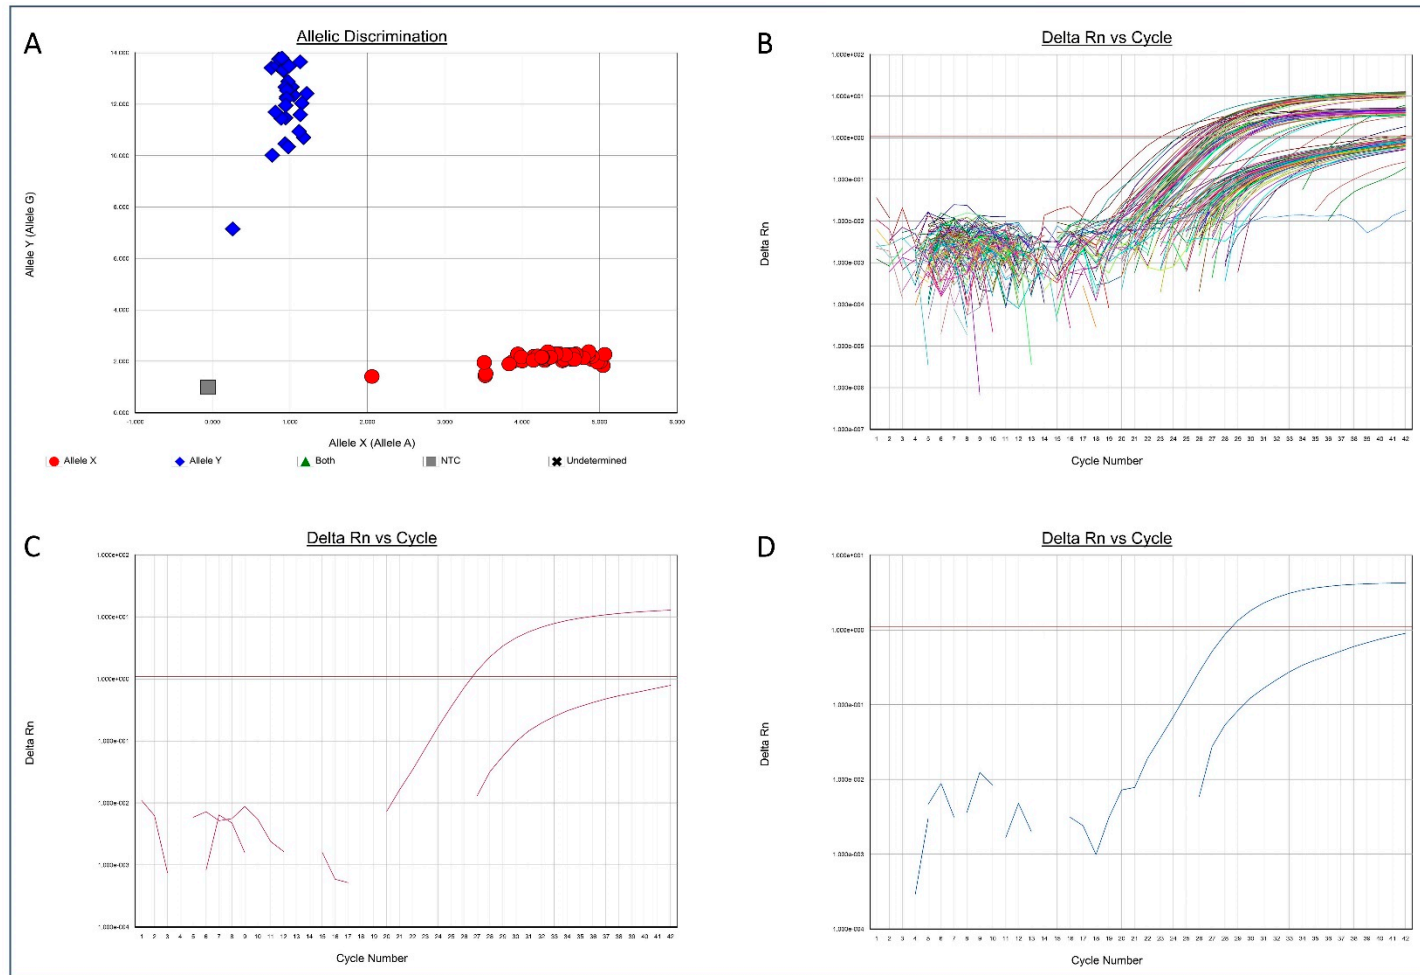

**Figure S1.** Graphical representation of the results obtained after MAOB rs1799836 genotyping with real time PCR. **(A)** Allelic discrimination method: a scatter plot representing the fluorescence of one allele plotted against the other. **(B)** Amplification plot: delta Rn value plotted against PCR cycle number for all the samples. **(C)** Amplification plot: delta Rn value plotted against PCR cycle number for A allele carrier. **(D)** Amplification plot: delta Rn value plotted against PCR cycle number for G allele carrier. Rn is the fluorescence of the reporter dye divided by the fluorescence of a passive reference dye, and delta Rn is Rn minus the baseline.
